# Supplementary material for: Democratizing cardiac imaging with an automated magnetic resonance exam
Source: Research Square preprint supplement (doi:10.21203/rs.3.rs-6857034/v1), 2025-07-18
Supplement: Supplementary file 1 [file 0211540023f0a01fef14d537.docx]

**Supplementary Information**

1. **Automated Biometric Summary**

Common volumetric and functional biomarkers are automatically calculated using the segmentations from AutoCMR cine data. The metrics are compared to sex-based normal values1 and reported values outside of expected range are flagged. An example biometric summary is provided for a subject with ischemic cardiomyopathy exhibiting LV and RV dilation and reduced LVEF in agreement with prior clinical findings.

**Patient Information**

Name: CIRC_00812

ID: CIRC_00812

Sex: M

DOB: 06/17/1987

Age: 37

Height (cm): 210.0

Weight (kg): 100.0

BMI (kg/m^2): 22.7

BSA (m^2): 2.45

HR (bpm): 49.0

Scan Date: 09/11/2024

MRI Scanner: Siemens Cima.X 3.0T

**MRI Techniques:**

* AutoCMR

Gadolinium Agent: 20 cc Elucerim

**Left Atrium:**

- LA Volume (max): 89 mL (normal range: 31-112 mL)

- LA Volume index (max): 36 mL/m^2 (normal range: 17-59 mL/m^2)

**Right Atrium:**

- RA Volume (max): 112 mL (normal range: 24-105 mL)

- RA Volume index (max): 46 mL/m^2 (normal range: 15-61 mL/m^2)

Right atrium volume ( 112 mL) is above normal range (24-105 mL).

**Left Ventricle:**

- EDV: 292 mL (normal range: 83-207 mL)

- EDVi: 119 mL/m^2 (normal range: 47-107 mL/m^2)

- ESV: 162 mL (normal range: 19-88 mL)

- ESVi: 66 mL/m^2 (normal range: 11-47 mL/m^2)

- SV: 130 mL (normal range: 55-127 mL)

- SVi: 53 mL/m^2 (normal range: 30-66 mL/m^2)

- LVEF: 45% (normal range: 51-76%)

- CO: 6.4 L/min (normal range: 3.9-8.3 L/min)

- COi: 2.6 L/min/m^2 (normal range: 2.1-4.3 L/min/m^2)

- LVM: 189 g (normal range: 57-152 g)

- LVMi: 77 g/m^2 (normal range: 36-75 g/m^2)

LV end diastolic volume ( 292 mL) is above normal range (83-207 mL).

Left ventricular function ( 45%) is low (normal range: 51-76).

Left ventricular mass ( 189 g) is higher than the normal range (57-152 g).

**Right Ventricle:**

- EDV: 286 mL (normal range: 87-244 mL)

- EDVi: 117 mL/m^2 (normal range: 53-123 mL/m^2)

- ESV: 156 mL (normal range: 29-117 mL)

- ESVi: 63 mL/m^2 (normal range: 17-59 mL/m^2)

- SV: 131 mL (normal range: 43-146 mL)

- SVi: 53 mL/m^2 (normal range: 28-75 mL/m^2)

- RVEF: 46% (normal range: 42-72%)

- CO: 6.4 L/min (normal range: 2.8-8.3 L/min)

- COi: 2.6 L/min/m^2 (normal range: 1.5-4.5 L/min/m^2)

RV end diastolic volume ( 286 mL) is above normal range (87-244 mL).

1. Raisi-Estabragh, Z. *et al.* Cardiovascular Magnetic Resonance Reference Ranges From the Healthy Hearts Consortium. *JACC Cardiovasc. Imaging* **17**, 746–762 (2024).

1. **Diagnostic Accuracy**

Average diagnostic accuracy from an image review by two level 3 SCMR readers compared to ground truth derived from clinical MRI reports. AutoCMR images from a subset of 30 patients scanned at an academic hospital and 8 patients scanned at a community health center were assessed as well as corresponding clinical 2D CMR images.

|  | Academic Hospital (N=30) | | Community Health Center (N=8) | |
| --- | --- | --- | --- | --- |
| Diagnostic Category | Clinical 2D CMR Accuracy | AutoCMR  Accuracy | Clinical 2D CMR Accuracy | AutoCMR  Accuracy |
| LV/RV Hypertrophy | 0.88 | 0.87 | 0.88 | 0.75 |
| Cardiac Dilation | 0.60 | 0.60 | 0.63 | 0.63 |
| Myocardial Thinning | 0.93 | 0.93 | 0.94 | 0.94 |
| Aneurysmal LV | 0.97 | 0.95 | 1.00 | 1.00 |
| LV/RV Dysfunction | 0.82 | 0.72 | 0.81 | 0.56 |
| Valve Dysfunction | 0.62 | 0.60 | 0.88 | 0.75 |
| Wall Motion Abnormality | 0.75 | 0.75 | 1.00 | 0.81 |
| LV LGE | 0.83 | 0.80 | 0.69 | 0.63 |
| Pericardial LGE | 0.92 | 0.90 | 1.00 | 1.00 |
| Mass Thrombus | 1.00 | 0.98 | 1.00 | 1.00 |
| No LGE | 0.78 | 0.72 | 0.63 | 0.56 |
| No Significant Findings | 0.75 | 0.78 | 0.75 | 0.50 |
